# Supplementary material for: Consistent Trait-Temperature Interactions Drive Butterfly Phenology in Both Incidental and Survey Data
Source: Research Square preprint supplement (doi:10.21203/rs.3.rs-971294/v1), 2021-10-27
Supplement: Supplementary file 2 [file c05f899912f75ed39045c82a.xlsx]

## Sheet: S1Table1.trait_metadata
Field name	Data type	Description
scientific_name	text	Binomial scientific name of butterfly species included in study
	boolean	Identifier for species with sufficient phenometric and trait data for comparative analysis
wing.max	integer	maximum recorded wing span from field guides (units: mm)
wing.mean	numeric	mean or midpoint recorded wing span from field guides (units: mm)
mobility.code	integer	Numeric categories of mobility: 1 (low) - 5 (high) 1: No summer-only range indicated, i.e. no yearly expansion, and noted to stay local 2: No summer-only range indicated, i.e. no yearly expansion, not noted to stay local 3: No yearly expansions, noted for long-distance or migratory movement 4: Some yearly expansions, regular or mass migrations noted 5: Regular yearly expansions, mass migrations, …
canopy.open	boolean	Identifier for species which use open canopy habitats (more than one canopy category can be used by a species)
canopy.mixed	boolean	Identifier for species which use mixed canopy habitats (more than one canopy category can be used by a species)
canopy.closed	boolean	Identifier for species which use closed canopy habitats (more than one canopy category can be used by a species)
local.abundance.description	text	Abundance at local scales categorized as common or uncommon
host.breadth.index	numeric	Numeric rank for taxonomic breadth of reported host plants, 1 (low) - 4 (high); generally categorized as: (1) "few species within one genus", (2) multiple species within one genus, (3) "multiple species within one family", (4) "multiple families"
voltinism	numeric	Numeric value for number of generations per year reported for the region
voltinism.description	text	Voltinism categories (Univoltine, Bivoltine, Multivoltine) and notes
overwinter.strategy	text	Category of overwinter stage for resident species: adult, pupa, or larva, or "migrant" for species overwintering in other areas. None of the selected species overwinter as eggs in the study region.
egg.clusters	text	Notes on taxonomic breadth of reported host plants,
detectability.index	numeric	Numeric code for detectability, 1 (low) to 4 ( highest)
confusability.notes	text	Categories (low / medium / high) and notes on confusability of species, determined by expert opinion of author Ries
confusability.index	numeric	Numeric code for confusability, 1 (low) to 3 ( high)

## Sheet: S1Table2.species_traits
scientific_name	In.comp.model	wing.max	wing.mean	mobility.code	canopy.open	canopy.mixed	canopy.closed	local.abundance.description	host.breadth.index	voltinism	voltinism.description	overwinter.strategy	egg.clusters	detectability.index	confusability.notes	confusability.index
Ancyloxypha numitor	1	28	23	1	1	0	0	Common	2	3	Multivoltine	larva	0	2	Low	1
Asterocampa celtis	1	66	53	1	0	1	0	Common	1	3	Multivoltine	larva	1	1	Medium - Easily confused with Tawny emperor where they overlap	2
Atalopedes campestris	1	41	34.5	4	1	1	0	Common	2	3	Multivoltine	migrant	0	2	Medium	2
Cercyonis pegala	1	76	62	1	1	1	0	Common	2	1	Univoltine	larva	0	3	Low	1
Colias eurytheme	1	68	53.5	4	1	1	0	Common	2	3	Multivoltine	larva	0	3	Orange usually easy to see in summer but people often confuse with C. philodice	3
Colias philodice	1	70	56	4	1	0	0	Common	2	3	Multivoltine	larva	0	3	Never orange but pale yellow form of C. eurythem easy to confuse	3
Cupido comyntas	1	29	23.5	1	1	1	0	Common	2	3	Multivoltine	larva	0	2	Low	1
Danaus plexippus	1	114	95	5	1	1	0	Common	2	3	Multivoltine	migrant	0	3	Low	1
Epargyreus clarus	1	61	51	2	1	1	0	Common	2	3	Multivoltine	pupa	0	3	Low	1
Erynnis baptisiae	1	45	39	1	1	1	0	Common	2	2	Mostly two	larva	0	1	High lots of very similar Erynnis out there!	4
Euptoieta claudia	1	80	58	4	1	0	0	Uncommon	3	3	Multivoltine	migrant	0	3	Low	1
Eurytides marcellus	1	102	78	4	1	1	1	Common	1	3	Multivoltine	pupa	0	3	Low	1
Junonia coenia	1	69	52.5	5	1	1	0	Common	3	3	Multivoltine	migrant	0	2	Low	1
Limenitis archippus	1	76	67	2	1	1	1	Common	2	3	Multivoltine	larva	0	3	Medium, can be mistaken for monarch, but is generally distinguishable	2
Limenitis arthemis astyanax	1	92	79	4	0	1	1	Uncommon	3	3	Multivoltine	larva	0	3	Low	1
Megisto cymela	1	48	40.5	1	0	1	1	Common	1	3	Univoltine	larva	0	3	Low	1
Nastra lherminier	1	28	25.5	1	1	0	0	Uncommon	1	3	Multivoltine	unknown	0	1	High	4
Nymphalis antiopa	1	102	89	5	0	1	1	Uncommon	3	3	Multivoltine	adult	1	2	Low	1
Papilio glaucus	1	165	127	2	1	1	1	Common	3	3	Multivoltine	pupa	0	4	Low	1
Papilio polyxenes	1	113	88.5	2	1	1	0	Common	2	3	Multivoltine	pupa	0	3	Medium, one of several species that mimic pipevine, but it can usually be distinguished	3
Papilio troilus	1	130	104	4	0	1	1	Uncommon	1	3	Multivoltine	pupa	0	3	Medium, one of several species that mimic pipevine, but it can usually be distinguished	3
Phyciodes tharos	1	41	27.5	1	1	1	0	Common	1	3	Multivoltine	larva	1	2	Low, several similar species but this is the most common and can usually be distinguished	2
Pieris rapae	1	50	44	4	1	0	0	Common	2	3	Multivoltine	pupa	0	3	Low, several similar species, but in most of this range, they are by far the most common med-sized white, clear field marks	2
Poanes zabulon	1	39	32.5	2	0	1	1	Common	1	3	Multivoltine	unknown	0	1	Medium, several similar species, but can be distinguished with good look	3
Polites peckius	1	31	30.5	2	1	0	0	Common	1	2	Bivoltine	larva and pupa?	0	2	Medium	2
Polites themistocles	1	36	28	2	1	0	0	Common	1	3	Multivoltine	pupa	0	1	Medium, several similar species, but can be distinguished with good look	3
Polygonia comma	1	54	49.5	2	0	1	1	Common	2	3	Multivoltine	adult	1	2	Medium, hard to distinguish from P. interrogationnis without a good look	3
Polygonia interrogationis	1	76	62	4	0	1	1	Common	2	3	Multivoltine	adult	1	2	Medium, hard to distinguish from P. comma without a good look	3
Pyrgus communis	1	32	26	2	1	1	0	Uncommon	2	3	Multivoltine	larva	0	2	Low	1
Speyeria cybele	1	100	85.5	3	1	1	0	Common	1	1	Univoltine	larva	0	3	Low	1
Vanessa atalanta	1	70	60	5	1	1	0	Common	1	3	Multivoltine	adult	0	2	Low	1
Vanessa cardui	1	75	60	5	1	0	0	Common	3	3	Multivoltine	migrant	0	2	Medium, can be mistaken for V. virginiensis	3
Vanessa virginiensis	1	67	55.5	4	1	1	0	Common	3	3	Multivoltine	adult	0	2	Medium, can be mistaken for V. cardui	3
